# Supplementary material for: Synthesis of polyhedral phenylsilsesquioxanes with KF as the source of the fluoride ion
Source: Royal Society of Chemistry journal article supplement (doi:10.1039/b804224a), 2008-01-01
Supplement: b804224a.pdf [file b804224a.pdf]

Supporting information for:

## Synthesis of Polyhedral Phenylsilsesquioxanes with KF as the Source of Fluoride Ion

*Matjaž Koželj and Boris Orel\**

*National Institute of Chemistry, Hajdrihova 19, SI-1000 Ljubljana, Slovenia*

boris.orel@ki.si

**General Procedures.**  $^{29}\text{Si}$ -MAS NMR spectra were recorded on Varian NMR systems 600 spectrometer. All spectra were obtained at 25° C. FT-IR spectra of compounds were recorded as KBr pellets on Bruker IFS 66/S, FT-Raman spectra as powder pellets on Perkin Elmer 2000; X-ray powder diffractograms on X-ray powder diffractometer Siemens D 5000; mass spectra on a AutoSpec Q spectrometer with EI (electron ionization) for Ph-T<sub>8</sub> and Q-TOF methods for Ph-T<sub>12</sub>.

### Spectral characterization data.

**FT-Infrared and Raman spectra.** In the IR spectra, the absorption bands of silsesquioxane skeleton of the pre-polymer and T cages were clearly seen in the region from 1110 to 1130  $\text{cm}^{-1}$ . The additional sharp and strong band observed in the IR spectra of pre-polymer at 1136  $\text{cm}^{-1}$  was attributed to the phenyl ring mode (**Fig. 1**). This band could still be seen in the IR spectra of Ph-T<sub>8</sub> but not in the corresponding Ph-T<sub>12</sub> spectra (**Fig. 2**), suggesting clear distinction between both compounds. The shoulder band at 1044  $\text{cm}^{-1}$  observed in the IR spectra of pre-polymer we ascribed to the Si-O-Si mode of the double chain (ladder-like) polymer, which was absent in the IR spectra of Ph-T<sub>8</sub> and Ph-T<sub>12</sub>, inferring the formation of cage-like structures instead of double chain polymers. Additional band, which could serve for easy identification of cages, was noted at 424  $\text{cm}^{-1}$ , enabling the distinction of cages from the pre-polymers, which showed the corresponding symmetric stretching Si-O-Si mode at 494  $\text{cm}^{-1}$ .

Raman spectra (**Fig. 3**), even though they did not show very strong bands attributed to the Si-O-Si skeleton, showed weak bands in the region from 524 to 300  $\text{cm}^{-1}$  which were absent from the Raman spectra of pre-polymer.

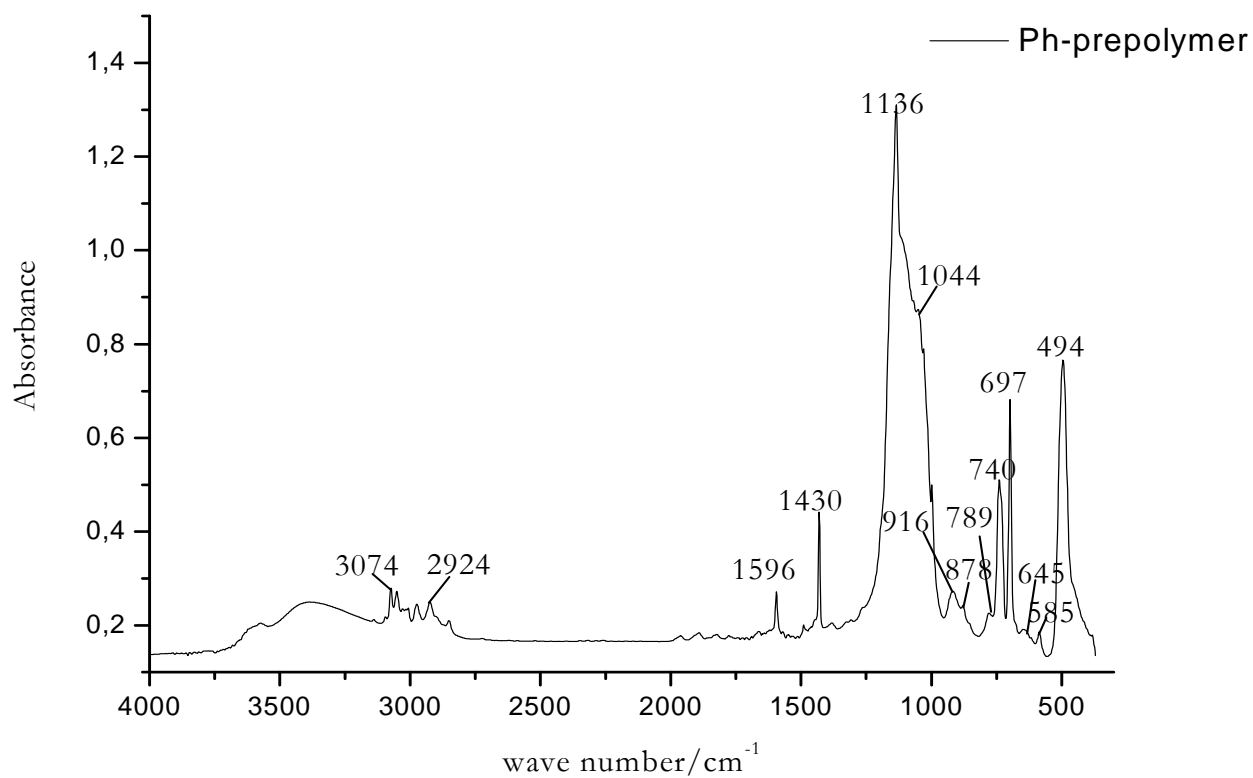

**Figure 1:** FT-IR spectra of prepolymer.

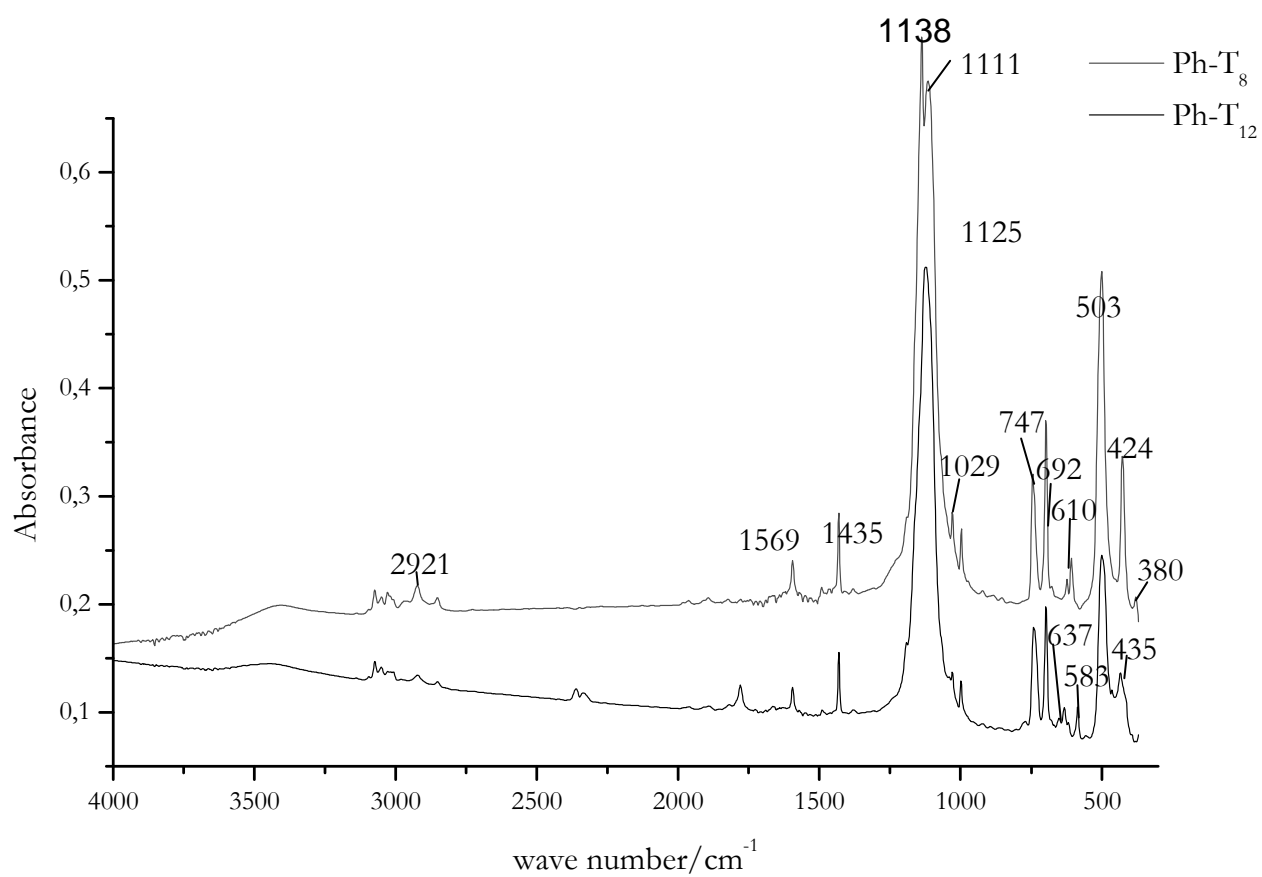

**Figure 2:** FT-IR spectra of Ph-T<sub>8</sub> and T<sub>12</sub>.

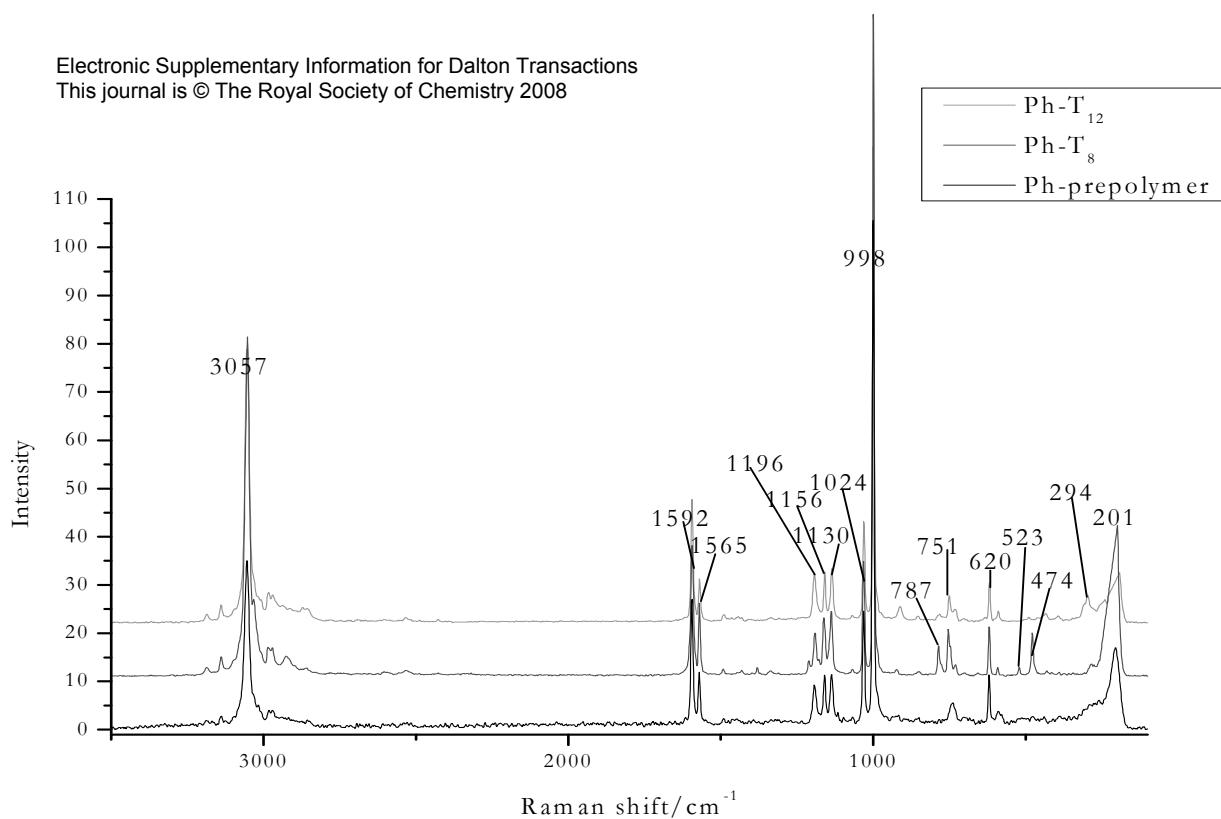

**Figure 3:** FT-Raman spectra of all three compounds.

**$^{29}\text{Si}$ -MAS NMR spectra:**  $^{29}\text{Si}$  NMR spectra are represented on **Fig. 4 and 5**. While the Ph-T<sub>8</sub> (**Fig. 5**) showed just one signal at -77.71 ppm, two signals were noted in the  $^{29}\text{Si}$ -NMR spectra of Ph-T<sub>12</sub>. It should be stressed that Bassindale et al. [[A. R. Bassindale, Z. Liu, I. A. MacKinnon, P. G. Taylor, Y. Yang, M. E. Light, P. N. Horton and M. B. Hursthouse, *Dalton Trans.* 2003, 2945], reported two signals at -76.82 and -80.40 ppm for Ph-T<sub>8</sub>, contrasting single band at 77.71 ppm observed in or spectra of Ph-T<sub>8</sub>. Spectra of synthesized Ph-T<sub>12</sub> showed practically the same signals (**Fig. 4**) as reported by Bassindale et al., for Ph-T<sub>8</sub>.

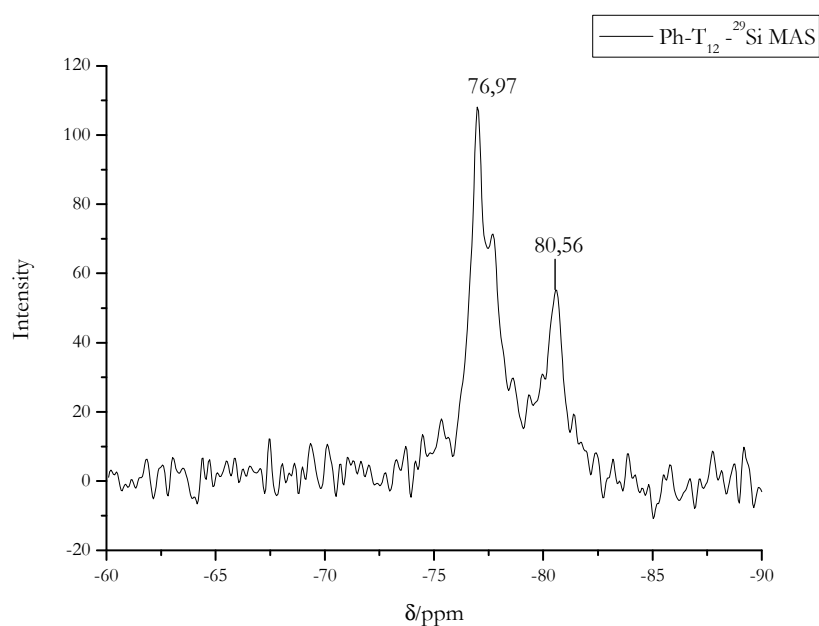

**Figure 4:**  $^{29}\text{Si}$ -MAS NMR spectra of Ph-T<sub>12</sub>.

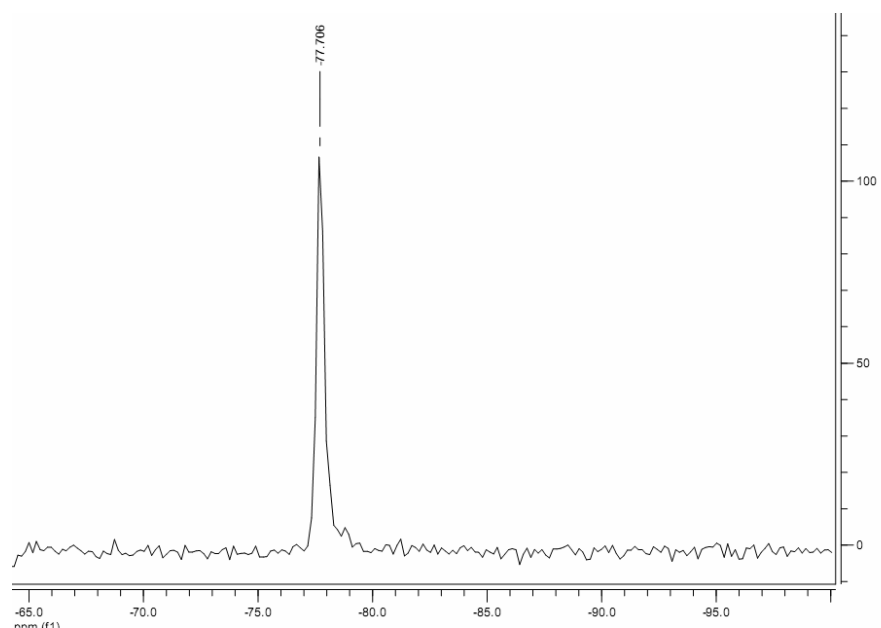

**Figure 5:**  $^{29}\text{Si}$ -MAS NMR spectra of Ph- $\text{T}_8$ .

iBu- $\text{T}_8$  exhibited in the  $^{29}\text{Si}$ -NMR spectra just one signal at -67, 82 ppm (**Fig. 6**).  $^1\text{H}$ -NMR spectra independently confirmed the presence of iBu groups on the  $\text{T}_8$  as could be conceived from **Fig. 7**.

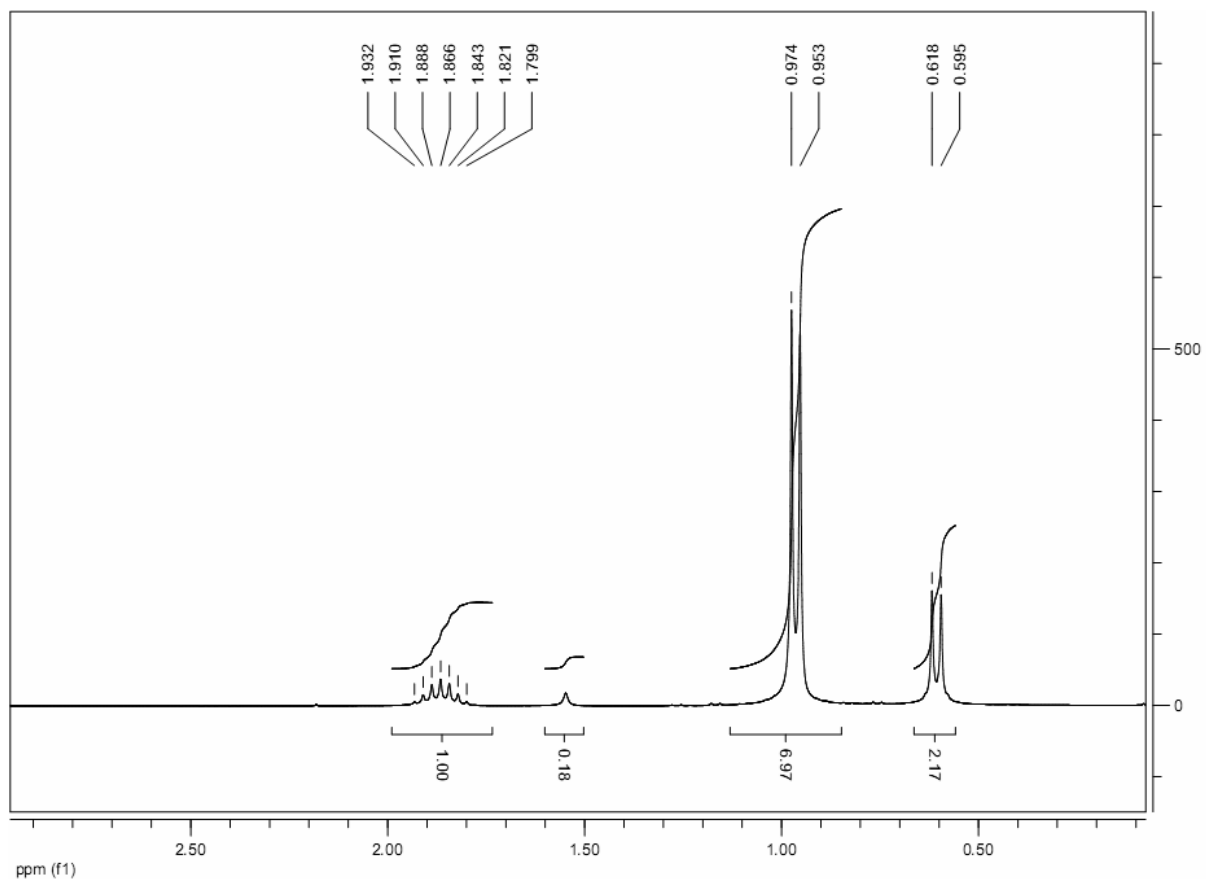

**Figure 6:**  $^1\text{H}$ -NMR spectra of iBu- $\text{T}_8$  ( $\text{CDCl}_3$ ). (signal at 1,56 ppm is water from impure NMR solvent)

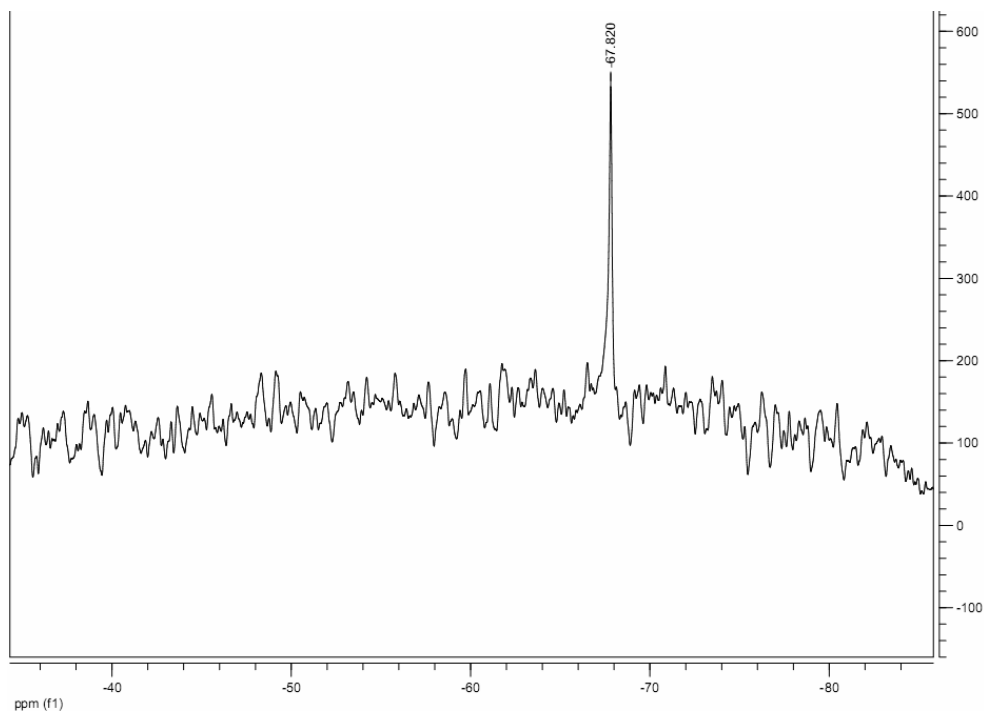

**Figure 7:**  $^{29}\text{Si}$ -NMR spectra of  $\text{iBu-T}_8$  ( $\text{CDCl}_3$ ).

**Powder XRD:** These data are confirming structure and purity of compounds, no additional recrystallization was performed.

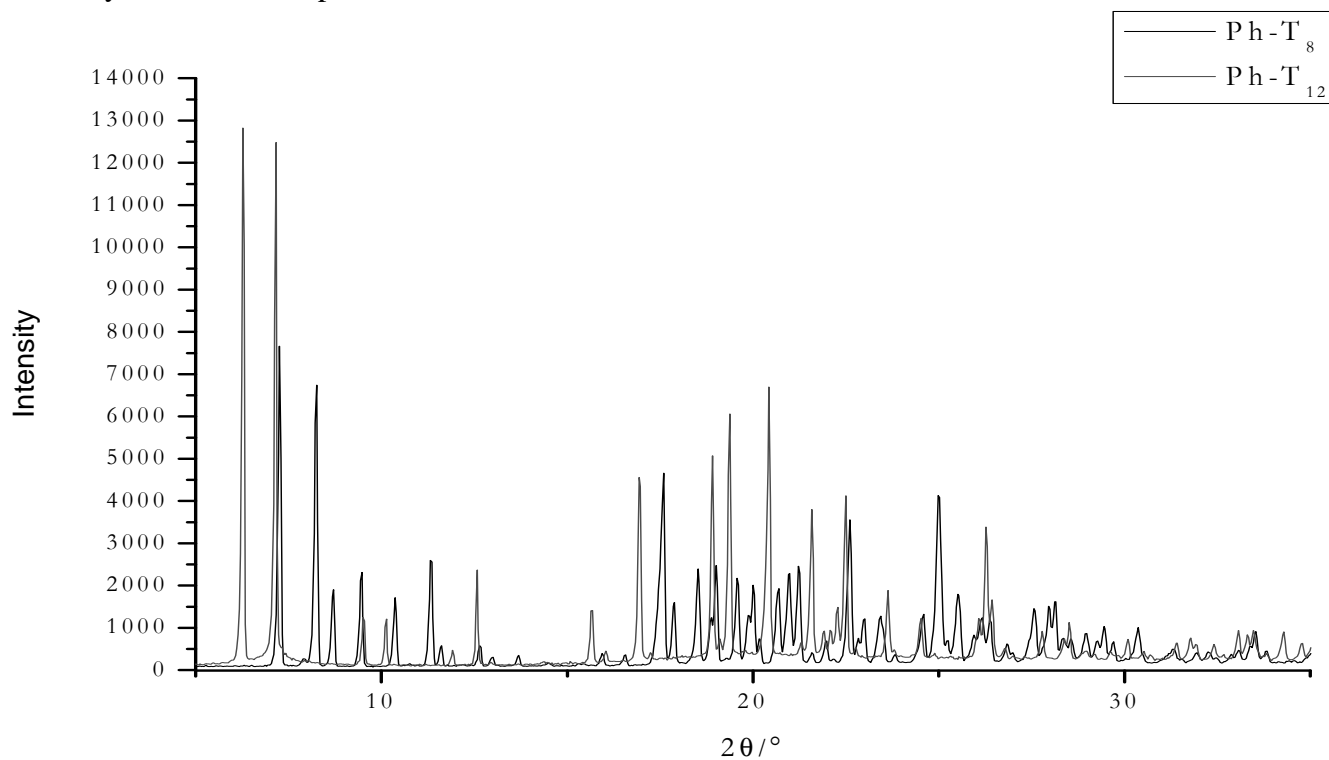

**Figure 8:** Powder XRD of both compounds recorded as obtained from reaction mixture.

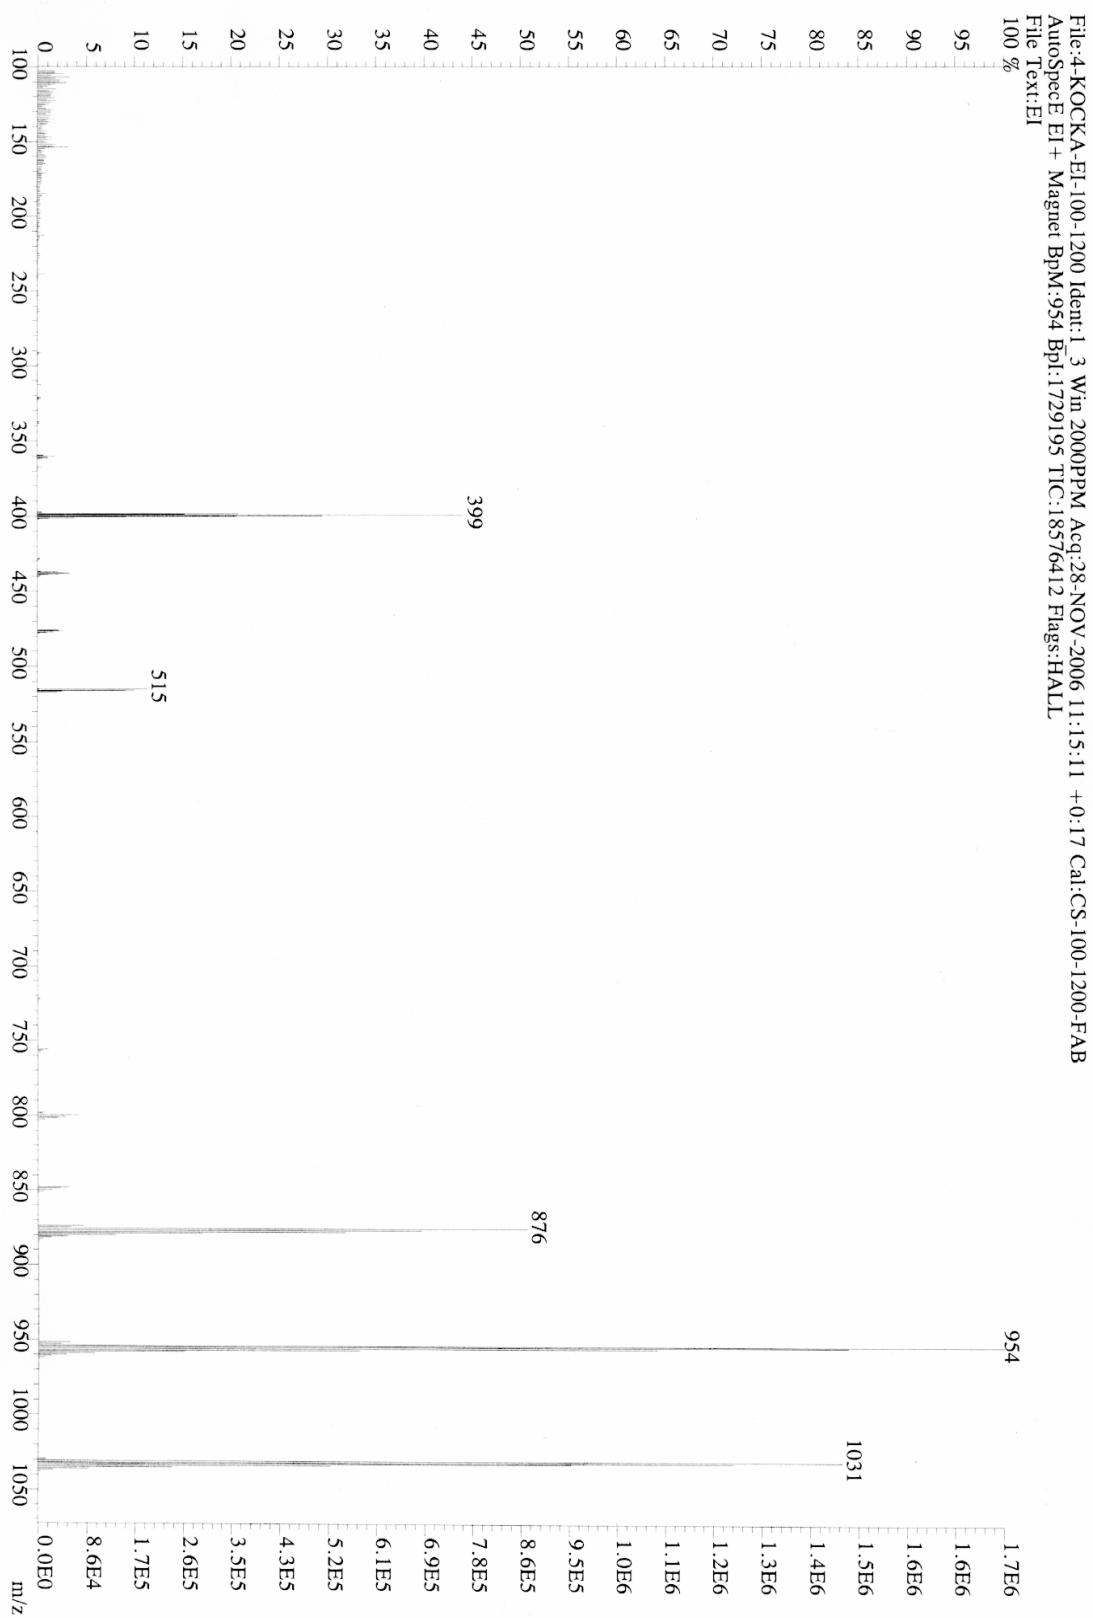

**Figure 9:** EI MS spectra of Ph-T<sub>8</sub>.

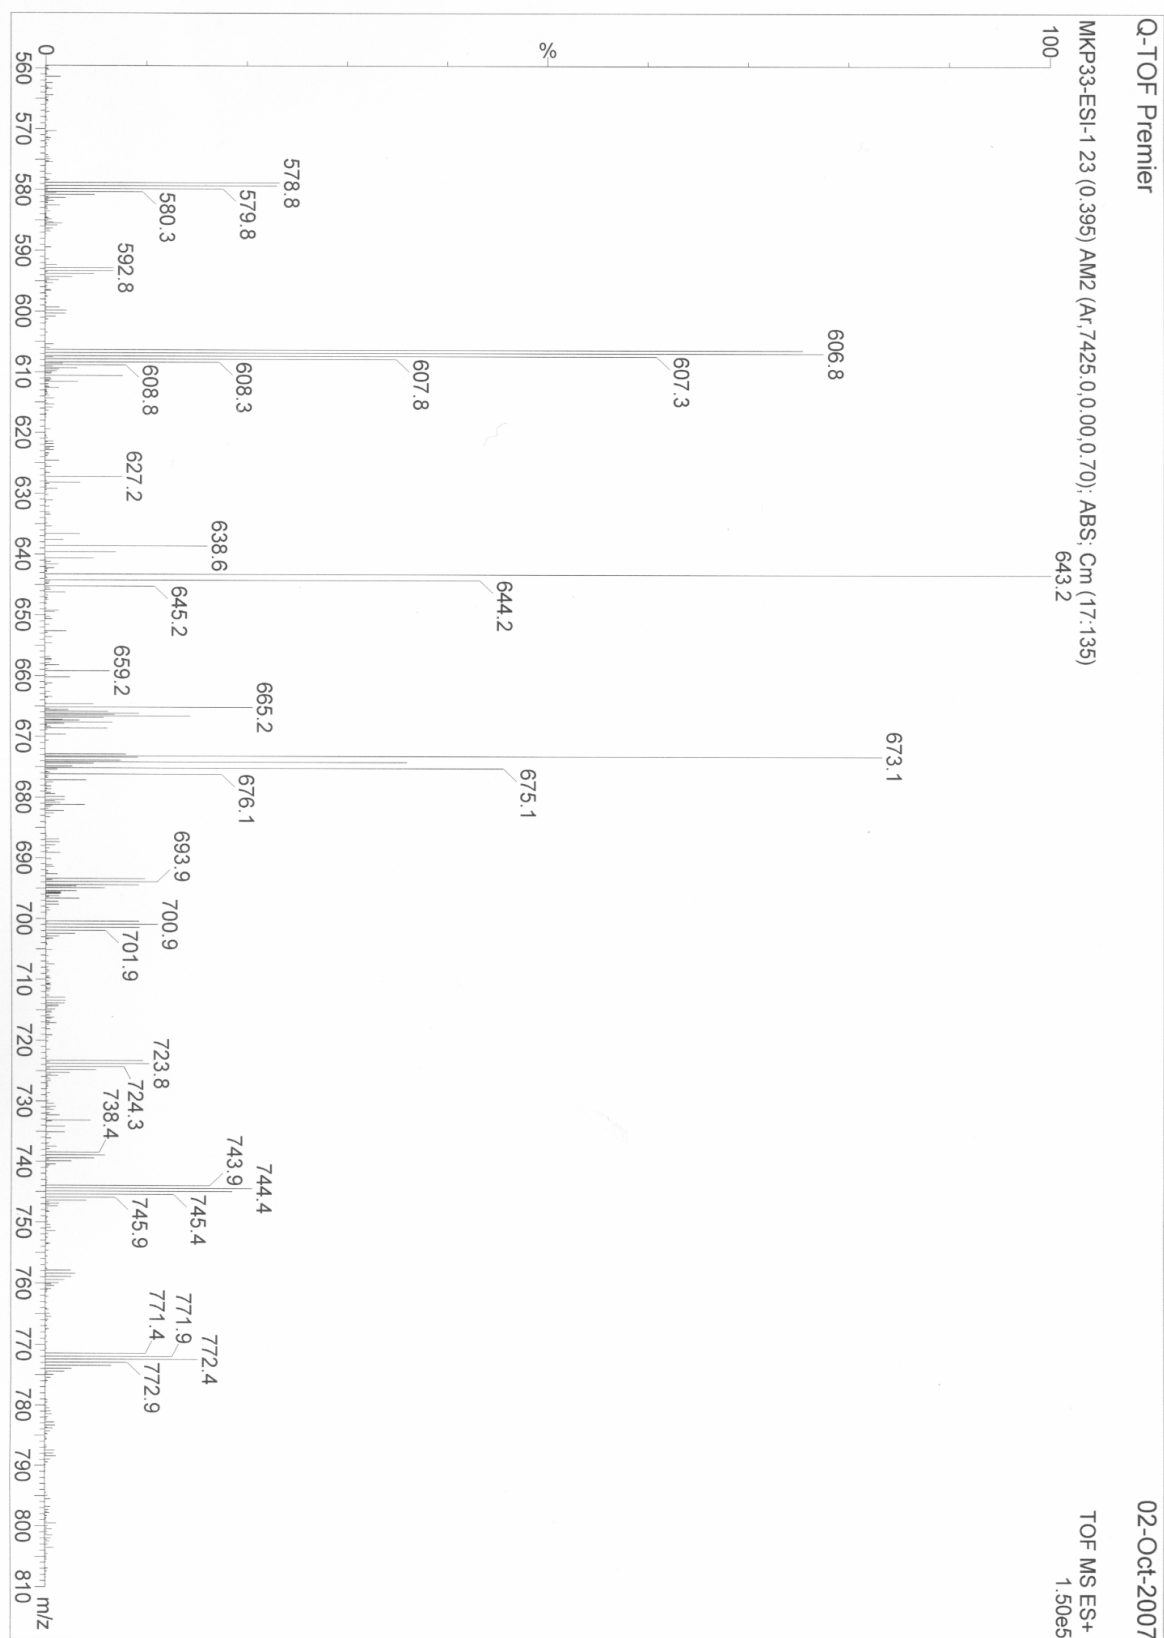

**Figure 10:** Q-TOF MS spectra of Ph-T<sub>12</sub>. There can be seen double charged molecular peaks at around 772 m/z.
